# Supplementary material for: Prognostic role of STAT3 in solid tumors: a systematic review and meta-analysis
Source: PubMed Central journal article supplement (PMC4991424; doi:10.18632/oncotarget.7887), 2016-03-03
Supplement: oncotarget-07-19863-s001.pdf [file oncotarget-07-19863-s001.pdf]

# Prognostic role of STAT3 in solid tumors: a systematic review and meta-analysis

## Supplementary Materials

### A. Colorectal cancer

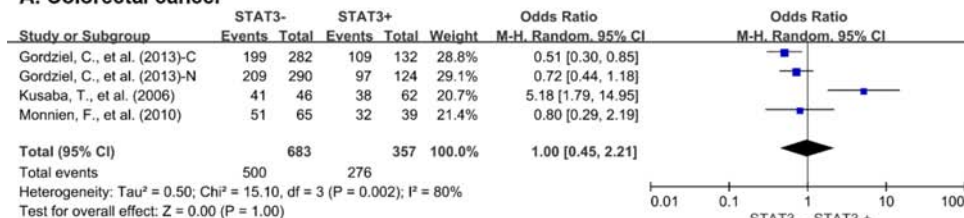

### B. Ovarian cancer

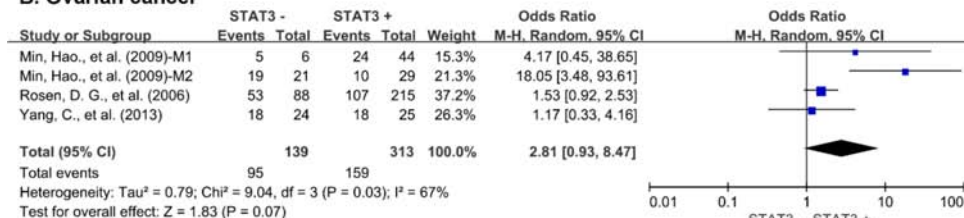

### C. Pancreatic cancer

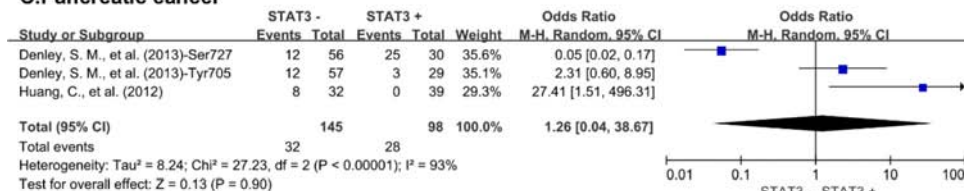

### D. Cervical cancer

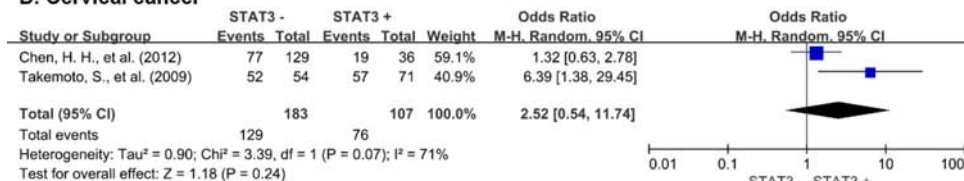

### E. Melanoma

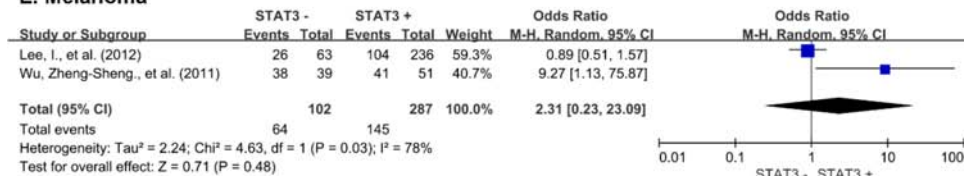

### F. Thymic epithelial tumor

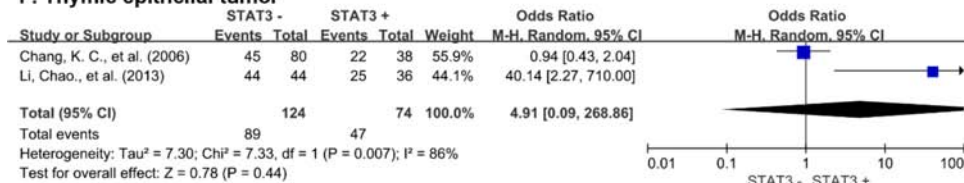

**Supplementary Figure S1: Subgroup analysis of 3-year OS by STAT3 expression in different tumor types.** (A) colorectal cancer; (B) ovarian cancer; (C) pancreatic cancer; (D) cervical cancer; (E) melanoma; (F) thymic epithelial tumor. M1: Marker 1, STAT3; M2: Marker 2, p-STAT3; N: nuclear expression; C: cytoplasmic expression.

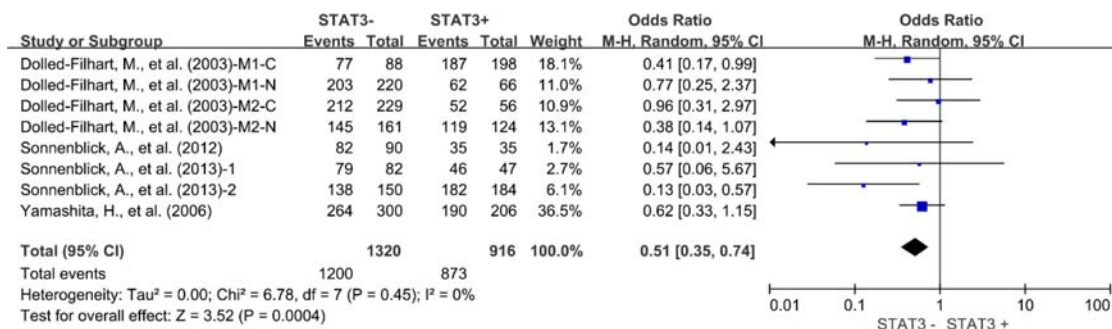

**Supplementary Figure S2: Subgroup analysis of 3-year OS by STAT3 expression in breast cancer.** M1: Marker 1, STAT3; M2: Marker 2, p-STAT3; N: nuclear expression; C: cytoplasmic expression.

### A. Colorectal cancer

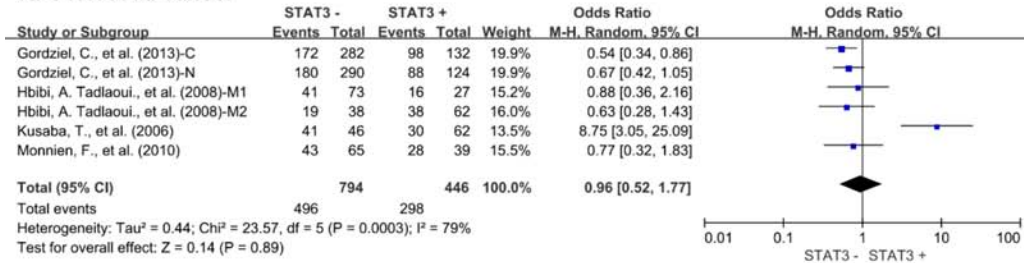

### B. Lung cancer

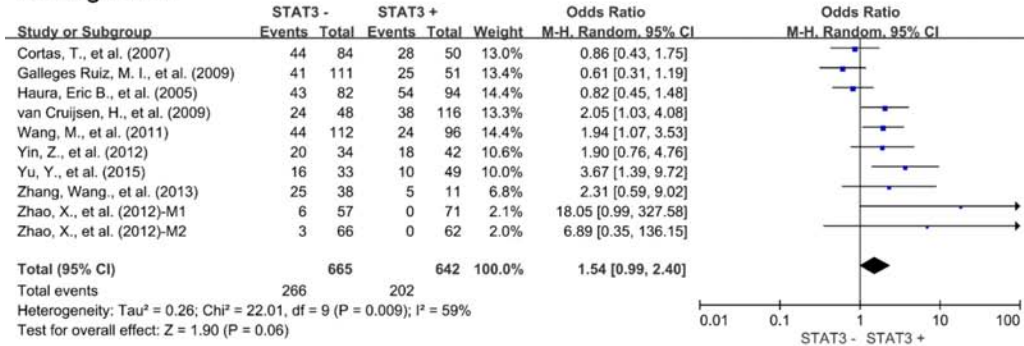

### C. Ovarian cancer

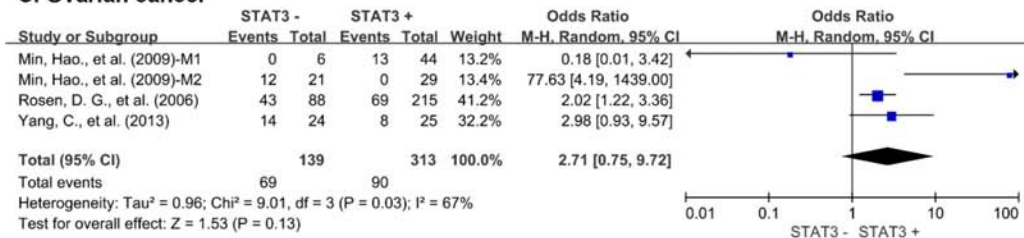

### D. Cervical cancer

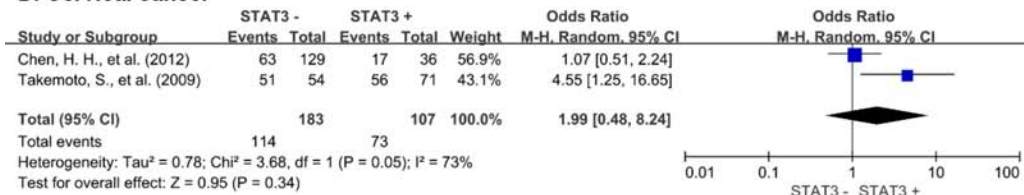

### E. Melanoma

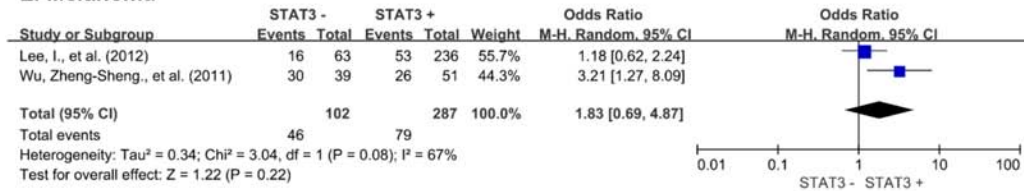

### F. Thymic epithelial tumor

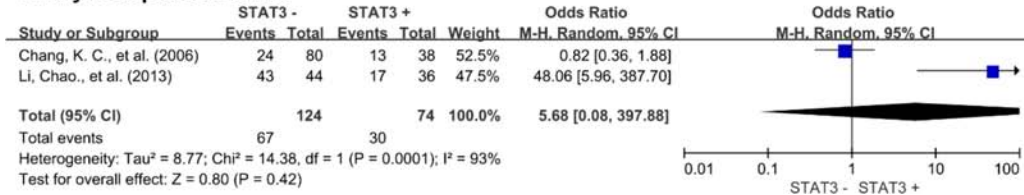

**Supplementary Figure S3: Subgroup analysis of 5-year OS by STAT3 expression in different tumor types. (A) colorectal cancer; (B) lung cancer; (C) ovarian cancer; (D) cervical cancer; (E) melanoma; (F) thymic epithelial tumor. M1: Marker 1, STAT3; M2: Marker 2, p-STAT3; N: nuclear expression; C: cytoplasmic expression.**

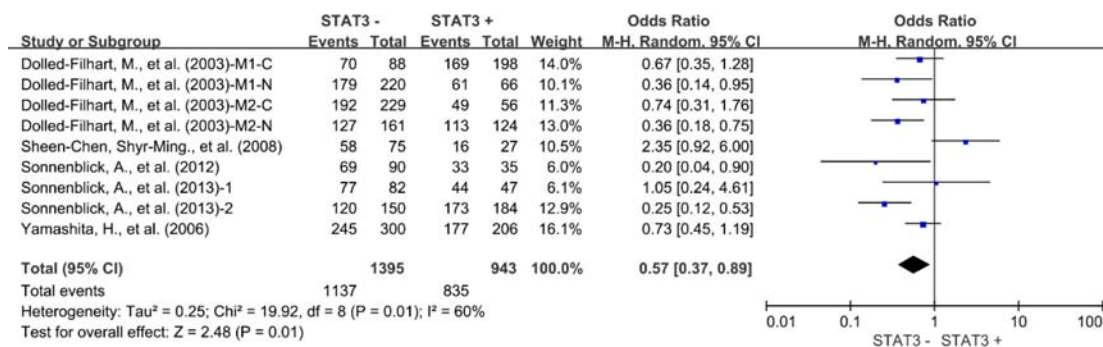

**Supplementary Figure S4: Subgroup analysis of 5-year OS by STAT3 expression in breast cancer.** M1: Marker 1, STAT3; M2: Marker 2, p-STAT3; N: nuclear expression; C: cytoplasmic expression.



### A. p-STAT3

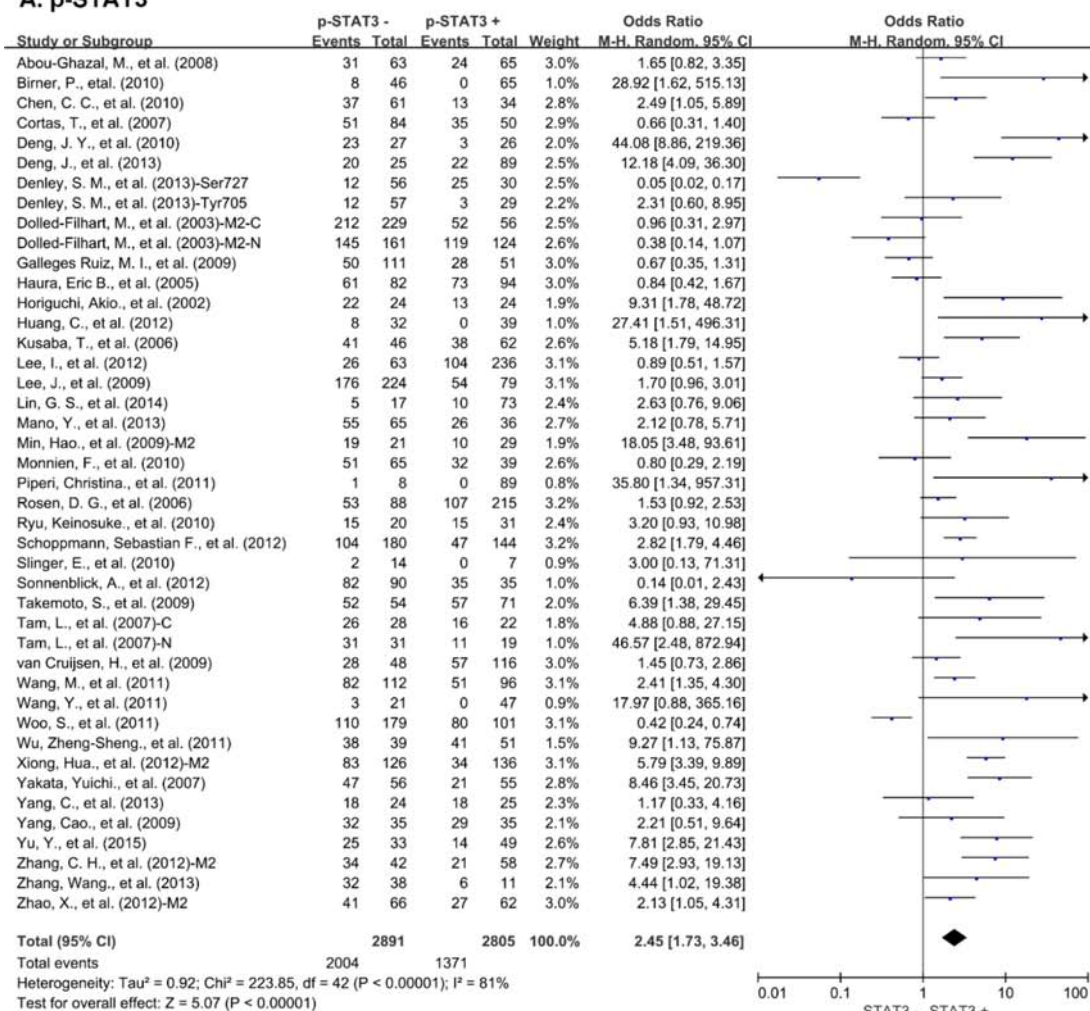

### B. STAT3

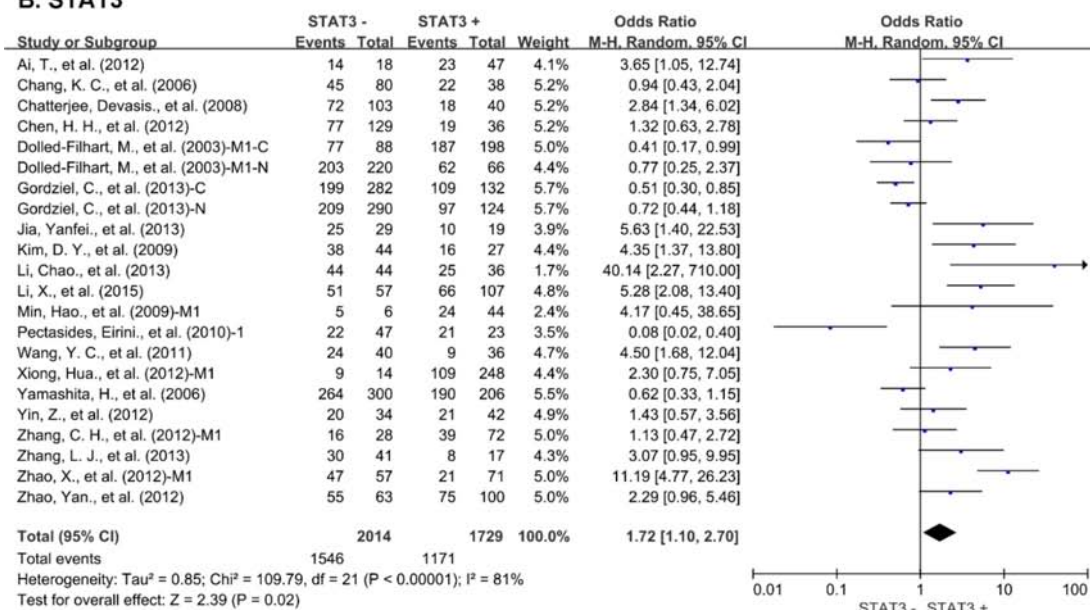

Supplementary Figure S5: Subgroup analysis of 3-year OS according to STAT3 and p-STAT3 expression in solid tumors. (A) p-STAT3; (B) STAT3; M1: Marker 1, STAT3; M2: Marker 2, p-STAT3; 1: Cohort 1; 2: Cohort 2; N: nuclear expression; C: cytoplasmic expression.

### A. p-STAT3

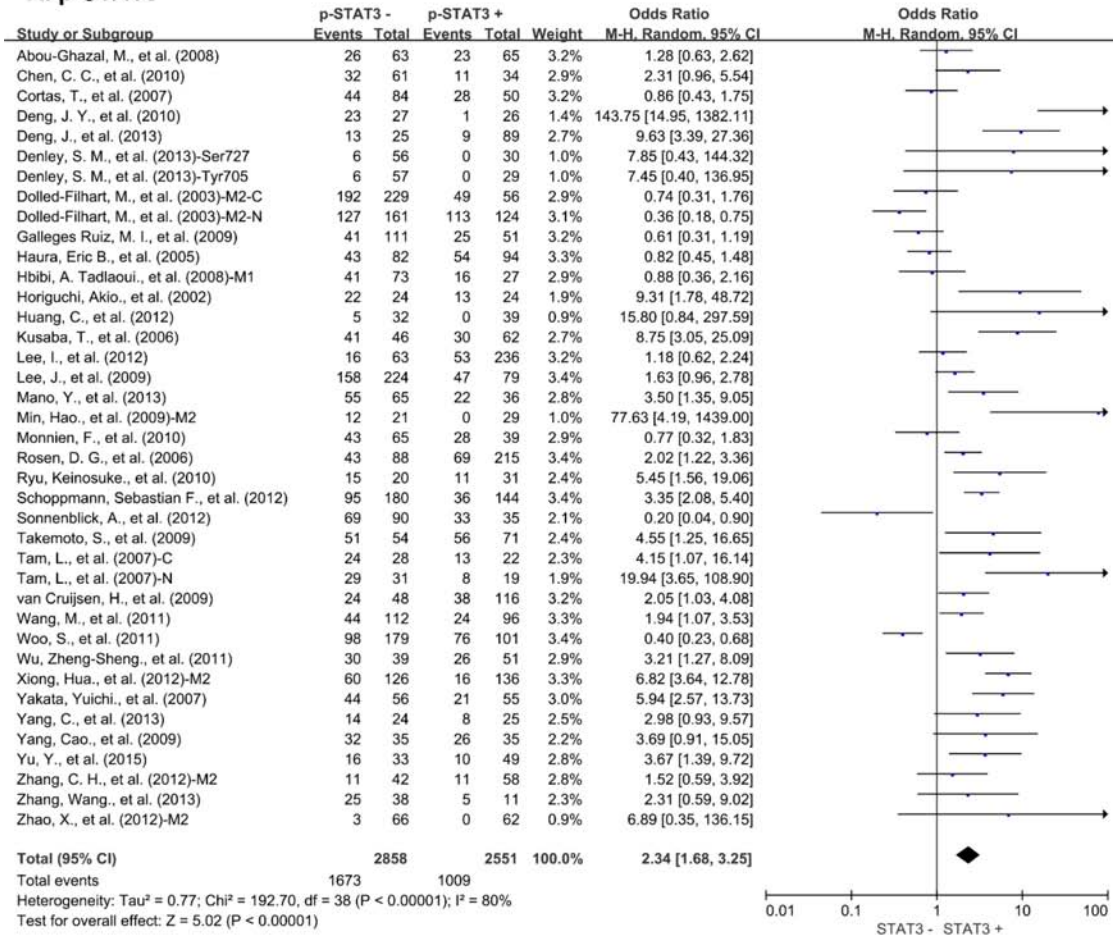

### B. STAT3

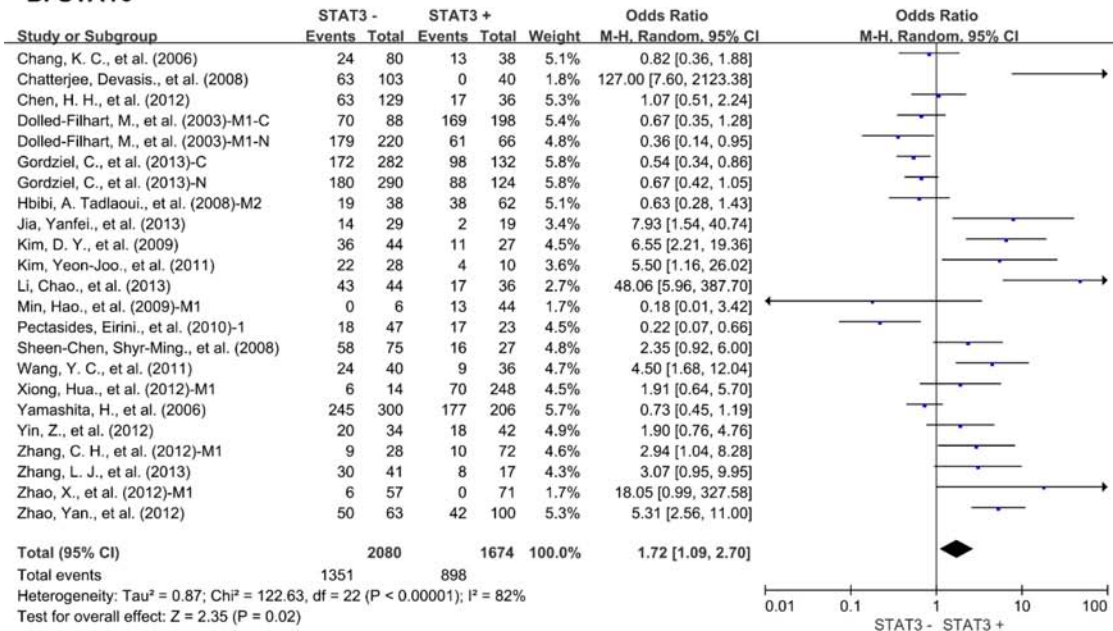

**Supplementary Figure S6: Subgroup analysis of 5-year OS according to STAT3 and p-STAT3 expression in solid tumors. (A) p-STAT3; (B) STAT3; M1: Marker 1, STAT3; M2: Marker 2, p-STAT3; 1: Cohort 1; 2: Cohort 2; N: nuclear expression; C: cytoplasmic expression.**

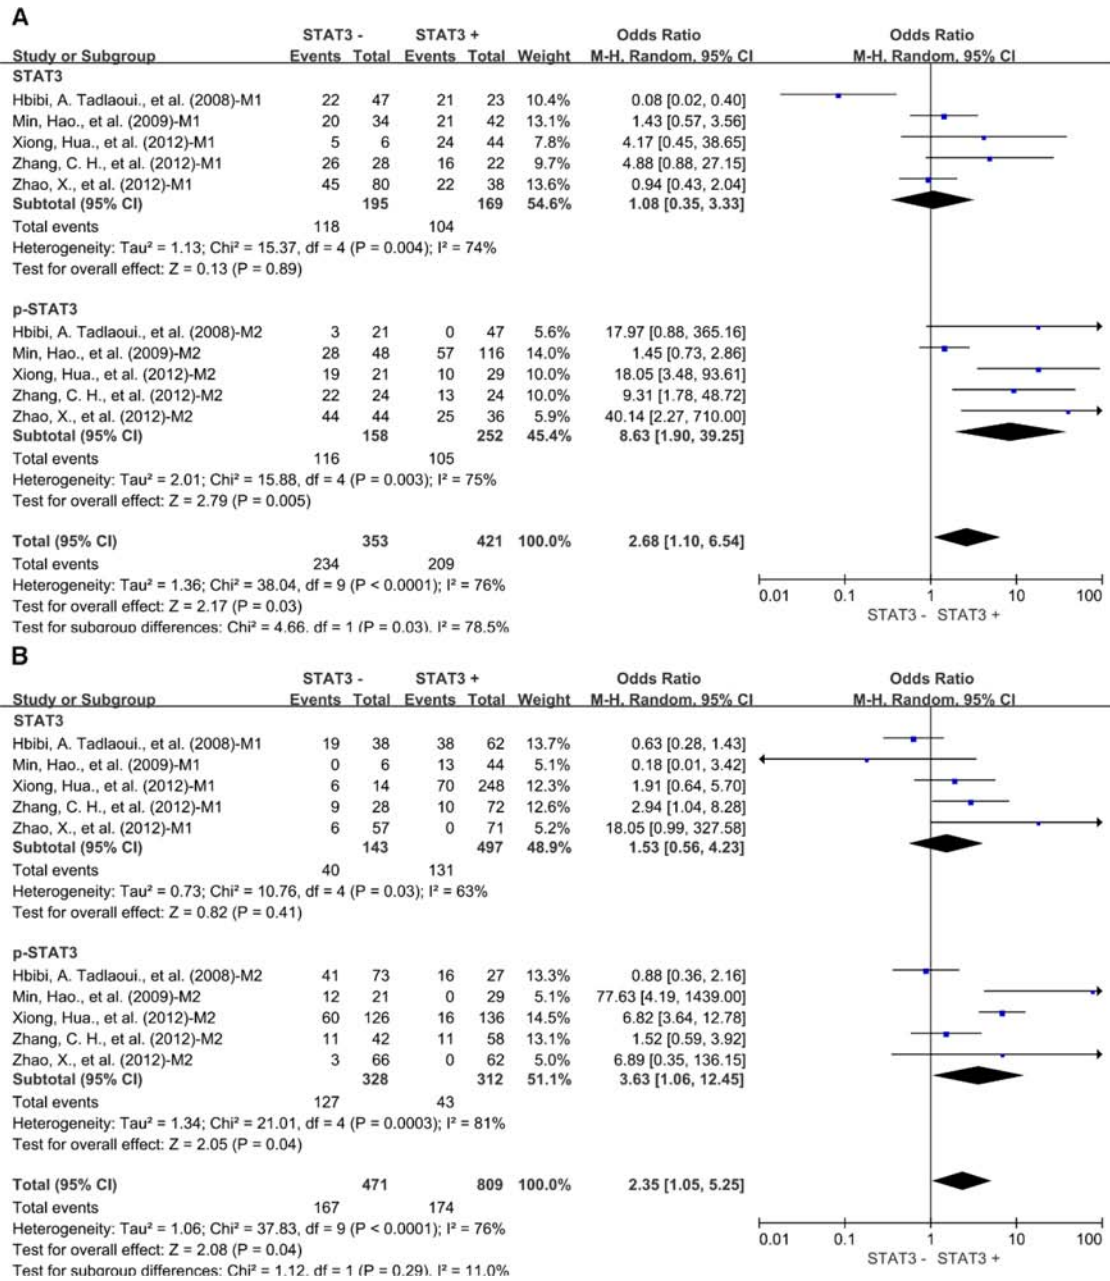

**Supplementary Figure S7: Subgroup analysis of OS according to STAT3 and p-STAT3 expression in studies evaluated both STAT3 and p-STAT3. (A) 3-year OS; (B) 5-year OS; M1: Marker 1, STAT3; M2: Marker 2, p-STAT3; N: nuclear expression; C: cytoplasmic expression.**



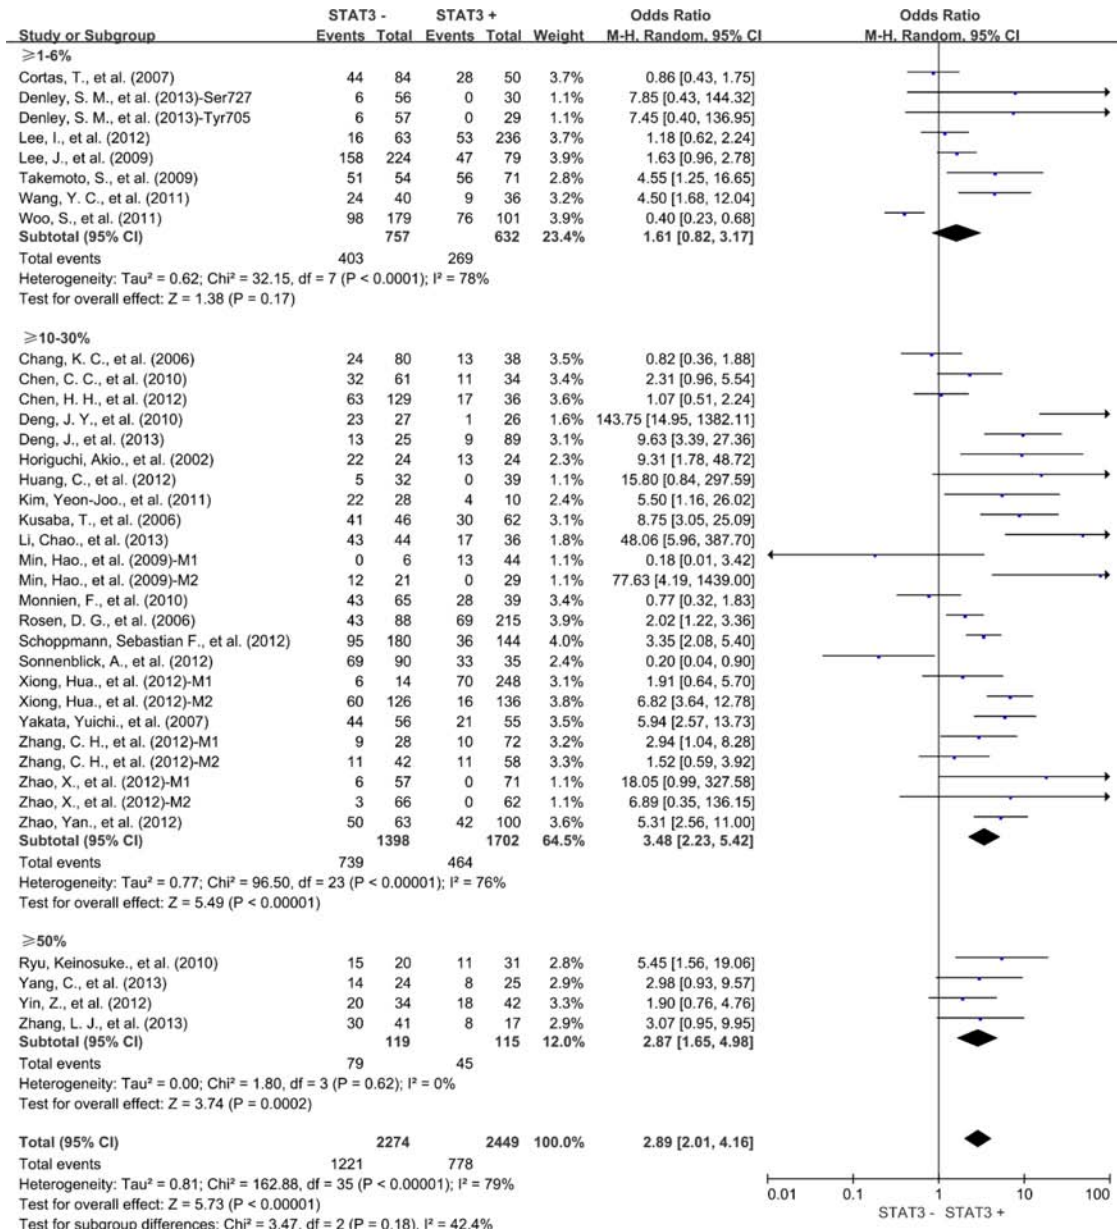

**Supplementary Figure S8: Subgroup analysis the correlation between STAT3 overexpression and 5-year OS according to cut-off values determining STAT3 positivity. M1: Marker 1, STAT3; M2: Marker 2, p-STAT3.**
